# Supplementary material for: CRISPR/Cas12a-Based Ultrasensitive and Rapid Detection of JAK2 V617F Somatic Mutation in Myeloproliferative Neoplasms
Source: MDPI journal article supplement (doi:10.3390/bios11080247), 2021-07-24
Supplement: s1 [file s1]

Partial intron 13 of *JAK2*

5'  $\overleftarrow{\text{actggctccccagagctttaggggtacacagaggctcctctacaattacatttattgaaaaaaacaaaaaccaagttcaaaggcactgtactaagga}}$

acatgcttagtgaaatctagatgcctctgggcatcatccagagatgtagctggcagaccccggtgccagtgccagagctctgaacatagcaagatatgata

cttacaatatctaaaggggtgtgtgttagaagatgatgtgaaagtcaagccaagagtggttctaaccagaataccacagattggtgattgtgattcacta

atcataccagggggtctagtcacagtttagtgaattagatgatgttaaactatgctagatcctgacacagatgctgtagattttatctgcacattcttaattctt

agcaagtggtatttaaaggctacatccatctacctcagtttctatatctatctctgacatctaccttagttgtactctgtcctctatttcagggttatgggtcaagcct

gttgactggcattattcatgattcctgtaccactctgtctctcactttgatctccatattccaggcttacacaggggttctcagaacgttgatggcagttgcag

gtccatataaagggaccaaagcacattgtatcctcatctatagtcagctgaaagtaggagaaagtcacatttattatggcagagagaattttctgaactattat

ggacaacagtcacaacaattctgtacttttttttcttag  $\overrightarrow{\text{TCTTTCTTTGAAGCAGCAAGTATGATGAGCAAGCTTTCTCACAA}}$  Exon 14 of *JAK2* PCR-F

$\overrightarrow{\text{GCATTGGTTTTAAATTATGGAGTATGT**JAK2 c.1849**TCTGTGGAGACGAGA}}$  crRNA-1 seed region

$\overleftarrow{\text{taagtaaaactacaggcttctaataatgctttctcagagcatc}}$  PCR-R

tgttttgttatatagaaaattcagtttcaggatcacagctaggtgtcagtgtaactataatttaacaggagtttaagttttgaaactgaaacactgtaggacta

ttcagttatatctgtgaaaaaggaaagcaatgaagttaaaagtagaaggttacaatgccaaacaatagagtattatagtaaaacaaatgtctataaaacattt

gtgtcatgatagcaaaagagattatggcaggttaacataacattggaataactggccttttcagtacaaacttatctggaattatgaagacaaagcatataaa

tgatacacttaattttaatggaactgacagaaatgattatgtgatagatactagatatattttggctaaatttaggtgtcacagaaactactaaaagtataaat

cgtaccccatgctttaactatacaggcatgcctattttatgcacctgtcttattgtgcttcttagatattgtattttacattatgaaggtttacggcaaccagtg

Partial intron 14 of *JAK2*

ctagcaactctgtcagcaacattttccaacagcatgtgctcatttcattgtct 3'

(a)

Partial intron 13 of *JAK2*

5'  $\overleftarrow{\text{actggctccccagagctttaggggtacacagaggctcctctacaattacatttattgaaaaaaacaaaaaccaagttcaaaggcactgtactaagga}}$

acatgcttagtgaaatctagatgcctctgggcatcatccagagatgtagctggcagaccccggtgccagtgccagagctctgaacatagcaagatatgata

cttacaatatctaaaggggtgtgtgttagaagatgatgtgaaagtcaagccaagagtggttctaaccagaataccacagattggtgattgtgattcacta

atcataccagggggtctagtcacagtttagtgaattagatgatgttaaactatgctagatcctgacacagatgctgtagattttatctgcacattcttaattctt

agcaagtggtatttaaaggctacatccatctacctcagtttctatatctatctctgacatctaccttagttgtactctgtcctctatttcagggttatgggtcaagcct

gttgactggcattattcatgattcctgtaccactctgtctctcactttgatctccatattccaggcttacacaggggttctcagaacgttgatggcagttgcag

gtccatataaagggaccaaagcacattgtatcctcatctatagtcagctgaaagtaggagaaagtcacatttattatggcagagagaattttctgaactattat

ggacaacagtcacaacaattctgtacttttttttcttag  $\overrightarrow{\text{TCTTTCTTTGAAGCAGCAAGTATGATGAGCAAGCTTTCTCACAA}}$  Exon 14 of *JAK2* PCR-F

$\overrightarrow{\text{GCATTGGTTTTAAATTATGGAGTATGT**JAK2 c.1849G>T (V617F)**TCTGTGGAGACGAGA}}$  PAM crRNA-1 seed region

$\overleftarrow{\text{taagtaaaactacaggcttctaataatgctttctcagagcatc}}$  PCR-R

tgttttgttatatagaaaattcagtttcaggatcacagctaggtgtcagtgtaactataatttaacaggagtttaagttttgaaactgaaacactgtaggacta

ttcagttatatctgtgaaaaaggaaagcaatgaagttaaaagtagaaggttacaatgccaaacaatagagtattatagtaaaacaaatgtctataaaacattt

gtgtcatgatagcaaaagagattatggcaggttaacataacattggaataactggccttttcagtacaaacttatctggaattatgaagacaaagcatataaa

tgatacacttaattttaatggaactgacagaaatgattatgtgatagatactagatatattttggctaaatttaggtgtcacagaaactactaaaagtataaat

cgtaccccatgctttaactatacaggcatgcctattttatgcacctgtcttattgtgcttcttagatattgtattttacattatgaaggtttacggcaaccagtg

Partial intron 14 of *JAK2*

ctagcaactctgtcagcaacattttccaacagcatgtgctcatttcattgtct 3'

(b)

**Figure S1.** The sequences of inserts in the recombinant plasmids. (a) The inserted sequence of the wild-type plasmid. The *JAK2* c.1849 was indicated in bold and red. (b) The inserted sequence of the mutant-type plasmid. The *JAK2* c.1849G>T (V617F) was indicated in bold and red. The PAM was in bold and underlined by a black line. The crRNA-1 seed region was indicated with a red line. The exon 14 of *JAK2* was in gray shadow. The partial intron 13 of

*JAK2* was in purple and underlined by a purple arrow. The partial intron 14 of *JAK2* was in blue and underlined by a blue arrow. The PCR primers (PCR-F, PCR-R) were indicated by orange arrows.

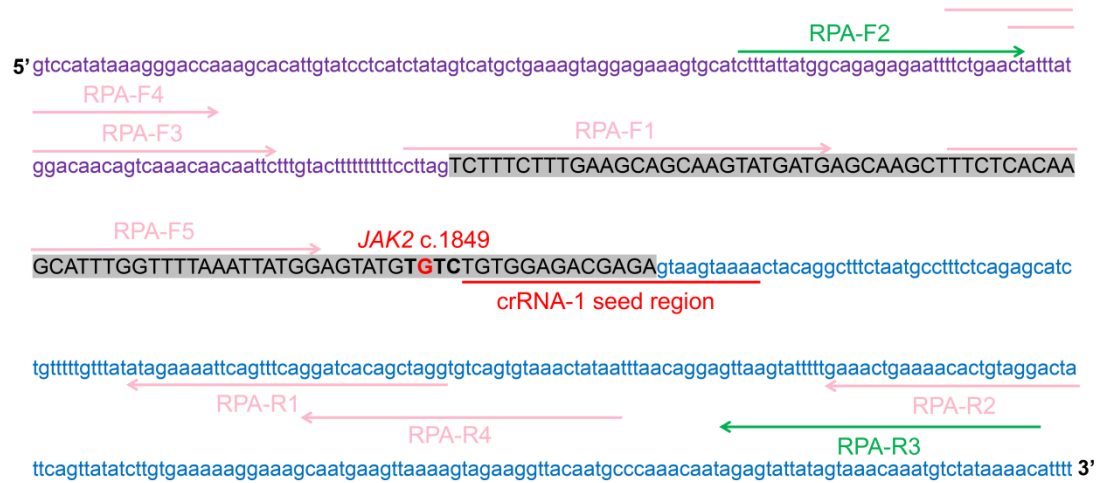

**Figure S2.** Schematic representation of the locations of RPA primers. The primers RPA-F2 and RPA-R3 used for RPA in this study were indicated by green arrows. The other RPA primers were indicated by pink arrows.

**Table S1.** Detailed sequences of primers, crRNAs, and probes in this study.

| Name                                   | Sequence                                            |
|----------------------------------------|-----------------------------------------------------|
| <b>F</b>                               | 5'-ACTTGGCTCCCCAGAGCTTTATGGGT-3'                    |
| <b>Fm</b>                              | 5'-TGGTTTTAAATTATGGAGTATGTTTCTGTGGAGACGAG-3'        |
| <b>R</b>                               | 5'-AGACATGAAATGAGCACATGCTGTTGGGA-3'                 |
| <b>Rm</b>                              | 5'-ACTTACTCTCGTCTCCACAGAAACATACTCCATAATTTA-3'       |
| <b>PCR-F</b>                           | 5'-AGCAAGCTTTCTCACAAGCAT-3'                         |
| <b>PCR-R</b>                           | 5'-ACACCTAGCTGTGATCCTGAA-3'                         |
| <b>RPA-F1</b>                          | 5'-CTTAGTCTTTCTTTGAAGCAGCAAGTATGATG-3'              |
| <b>RPA-F2</b>                          | 5'-CTTTATTATGGCAGAGAGAATTTTCTGAACT-3'               |
| <b>RPA-F3</b>                          | 5'-CTATTTATGGACAACAGTCAAACAACAATTC-3'               |
| <b>RPA-F4</b>                          | 5'-TTCTGAACTATTTATGGACAACAGTCAAACAA-3'              |
| <b>RPA-F5</b>                          | 5'-TTCTCACAAGCATTTGGTTTTAAATTATGG-3'                |
| <b>RPA-R1</b>                          | 5'-CCTAGCTGTGATCCTGAAACTGAATTTTCTAT-3'              |
| <b>RPA-R2</b>                          | 5'-AACTGAATAGTCCTACAGTGTTCAGTTTC-3'                 |
| <b>RPA-R3</b>                          | 5'-CCTACAGTGTTCAGTTTCAAAAATACTTAAC-3'               |
| <b>RPA-R4</b>                          | 5'-TTATAGTTTACACTGACACCTAGCTGTGATCC-3'              |
| <b>AS-F</b>                            | 5'-ATCTATAGTCATGCTGAAAGTAGGAGAAAAG-3'               |
| <b>AS-Fm</b>                           | 5'-AGCATTTGGTTTTAAATTATGGAGTATATT-3'                |
| <b>AS-R</b>                            | 5'-CTGAATAGTCCTACAGTGTTCAGTTTCA-3'                  |
| <b>crRNA-1</b>                         | 5'-UAAUUUCUACUAAGUGUAGAUUGUGGAGACGAGAGUAAGUAAAA-3'  |
| <b>crRNA-2</b>                         | 5'-UAAUUUCUACUAAGUGUAGAUAAUUUAUGGAGUAUGUUUCUGUGG-3' |
| <b>crRNA-3</b>                         | 5'-UAAUUUCUACUAAGUGUAGAUUGGAGUAUGUUUCUGUGGAGACG-3'  |
| <b>fluorophore-quencher (FQ) probe</b> | 5'-FAM/TTTTTTTTTTTT/MGB-3'                          |
| <b>FITC-ssDNA-Biotin probe</b>         | 5'-FITC/ACACACACACACACACAC/Biotin-3'                |
